# Supplementary material
Source: bioRxiv or medRxiv preprint supplement (https://www.biorxiv.org/highwire/filestream/35469/field_highwire_adjunct_files/6/077701-2.pdf)

**A**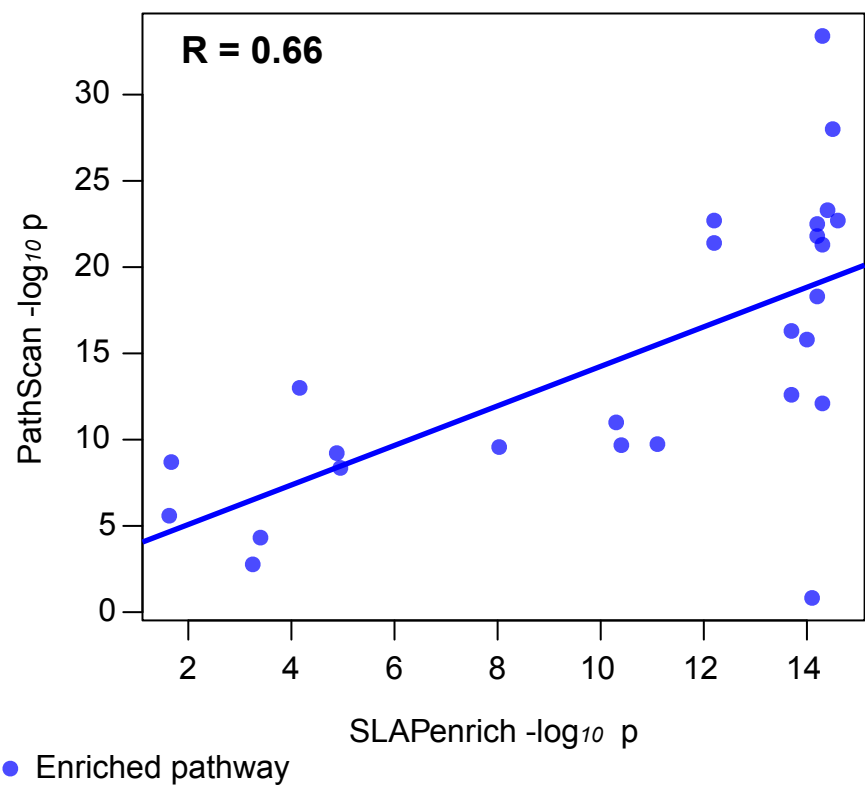**B**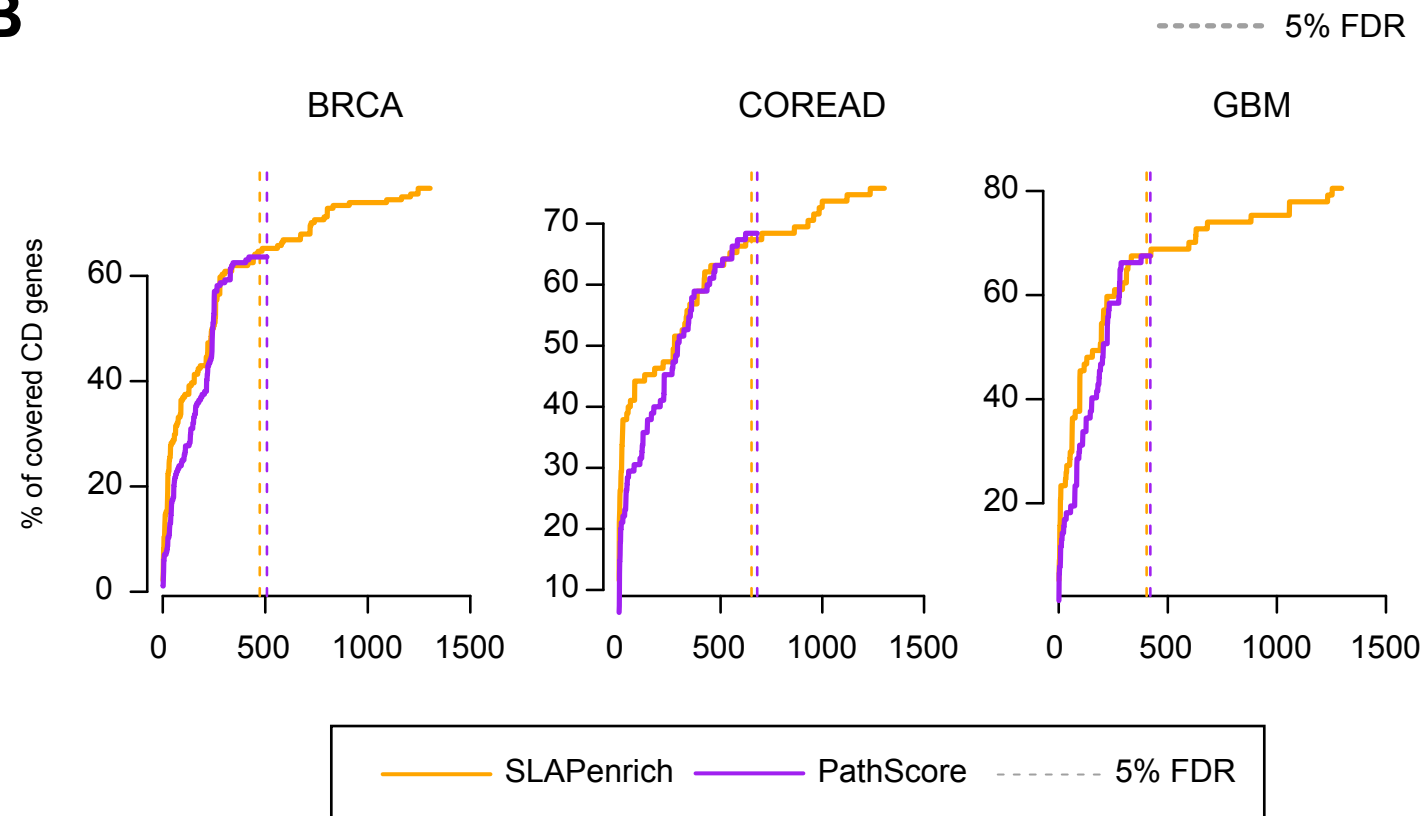**C**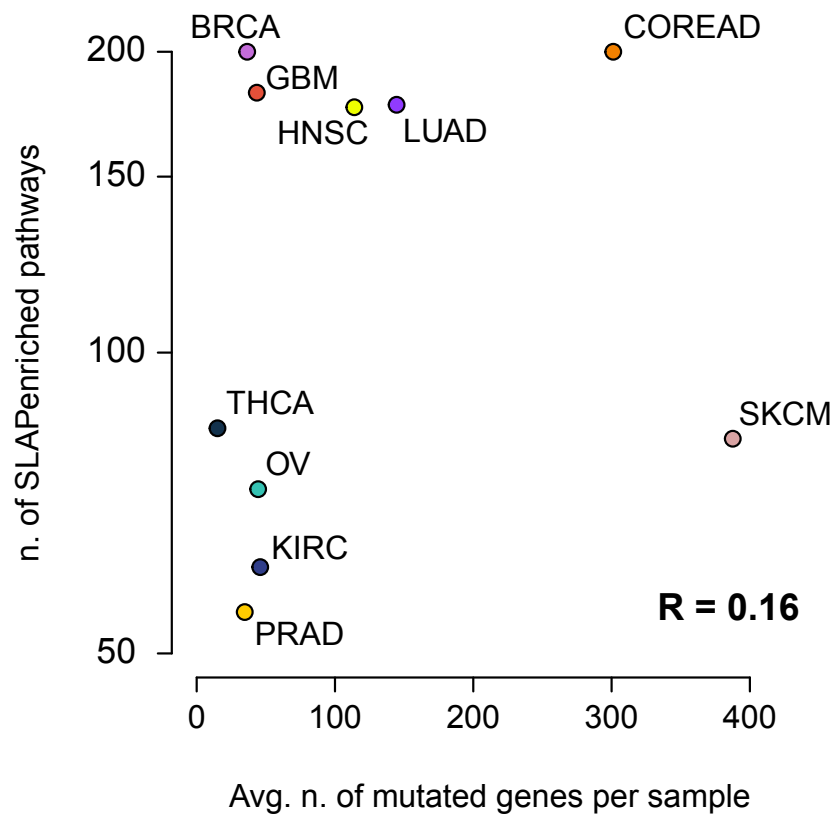**D**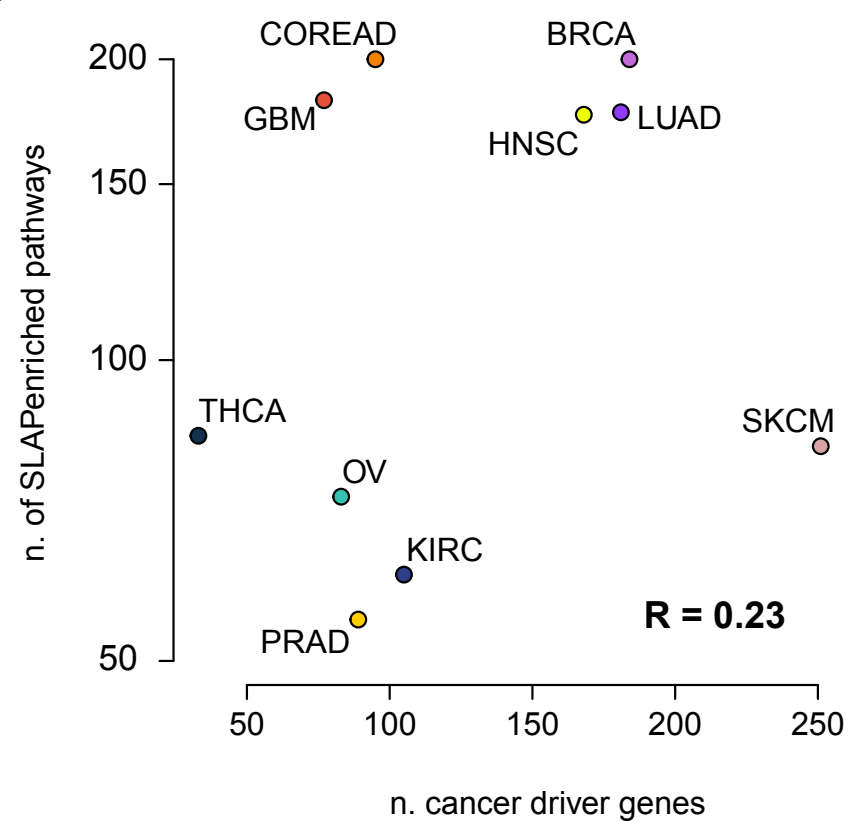

Supplement: Supplementary file [file 077701-2.pdf]
